# Supplementary material for: Farnesyl phenolic enantiomers as natural MTH1 inhibitors from Ganoderma sinense
Source: PubMed Central journal article supplement (PMC5707067; doi:10.18632/oncotarget.21430), 2017-09-30
Supplement: oncotarget-08-95865-s001.pdf [file oncotarget-08-95865-s001.pdf]

## Farnesyl phenolic enantiomers as natural MTH1 inhibitors from *Ganoderma sinense*

### SUPPLEMENTARY MATERIALS

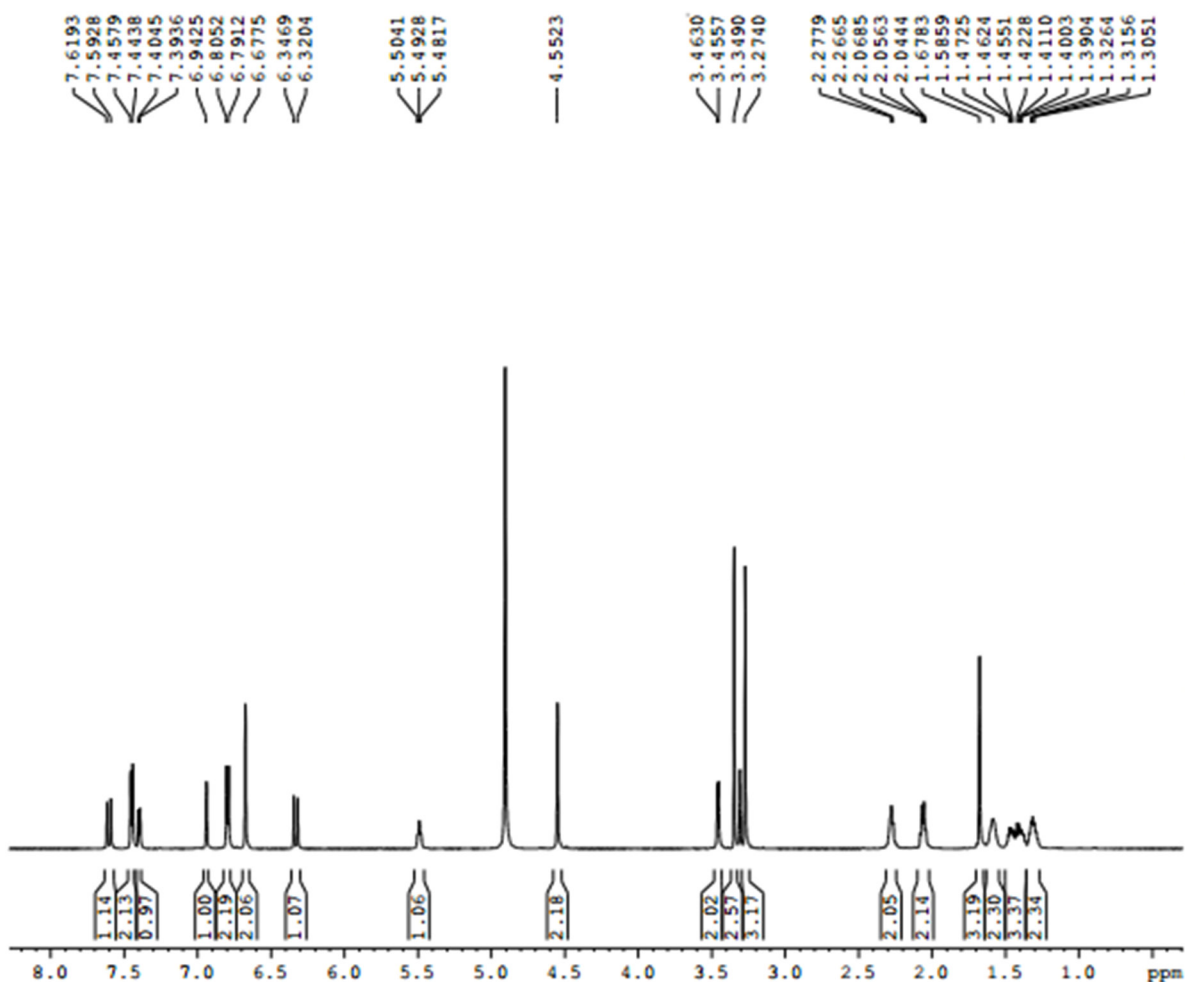

Supplementary Figure 1: <sup>1</sup>H NMR (400 MHz) spectrum of 1 and 2 in CD<sub>3</sub>OD.

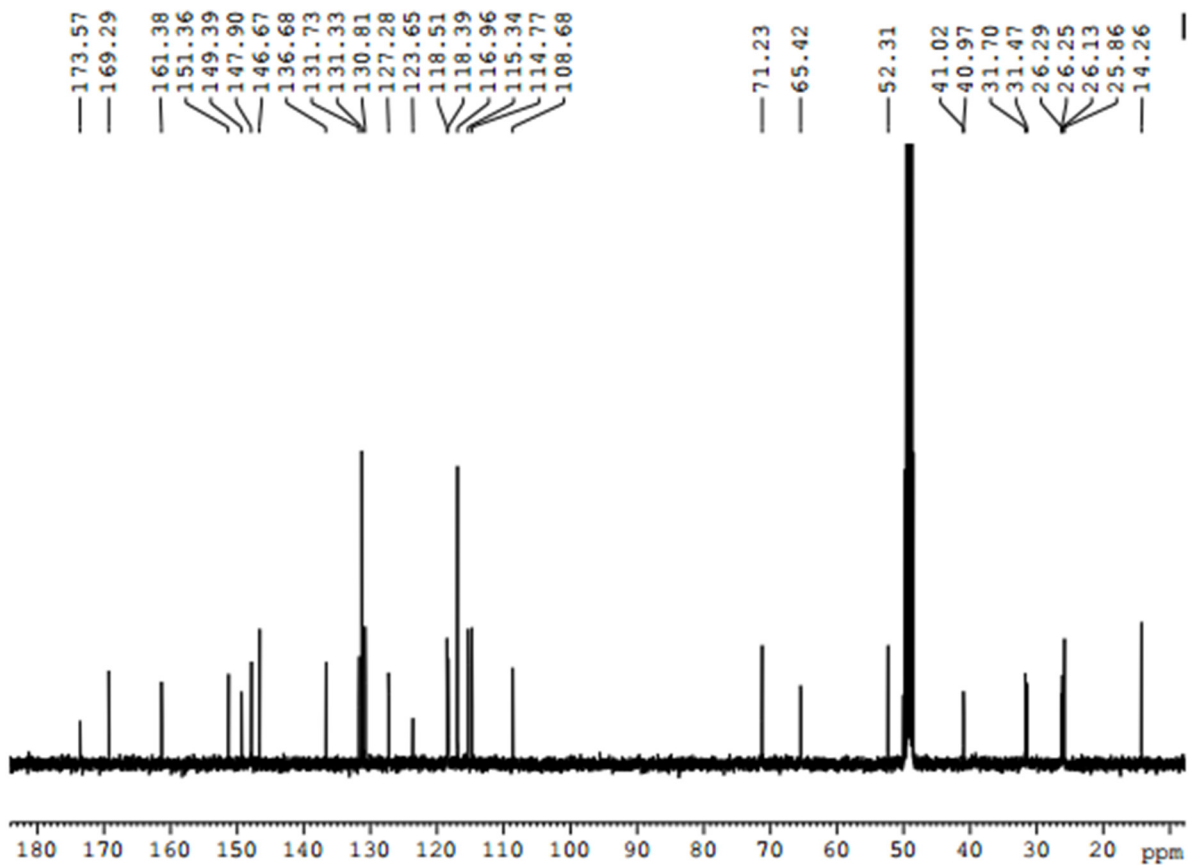

Supplementary Figure 2:  $^{13}\text{C}$  NMR (600 MHz) spectrum of 1 and 2 in  $\text{CD}_3\text{OD}$ .

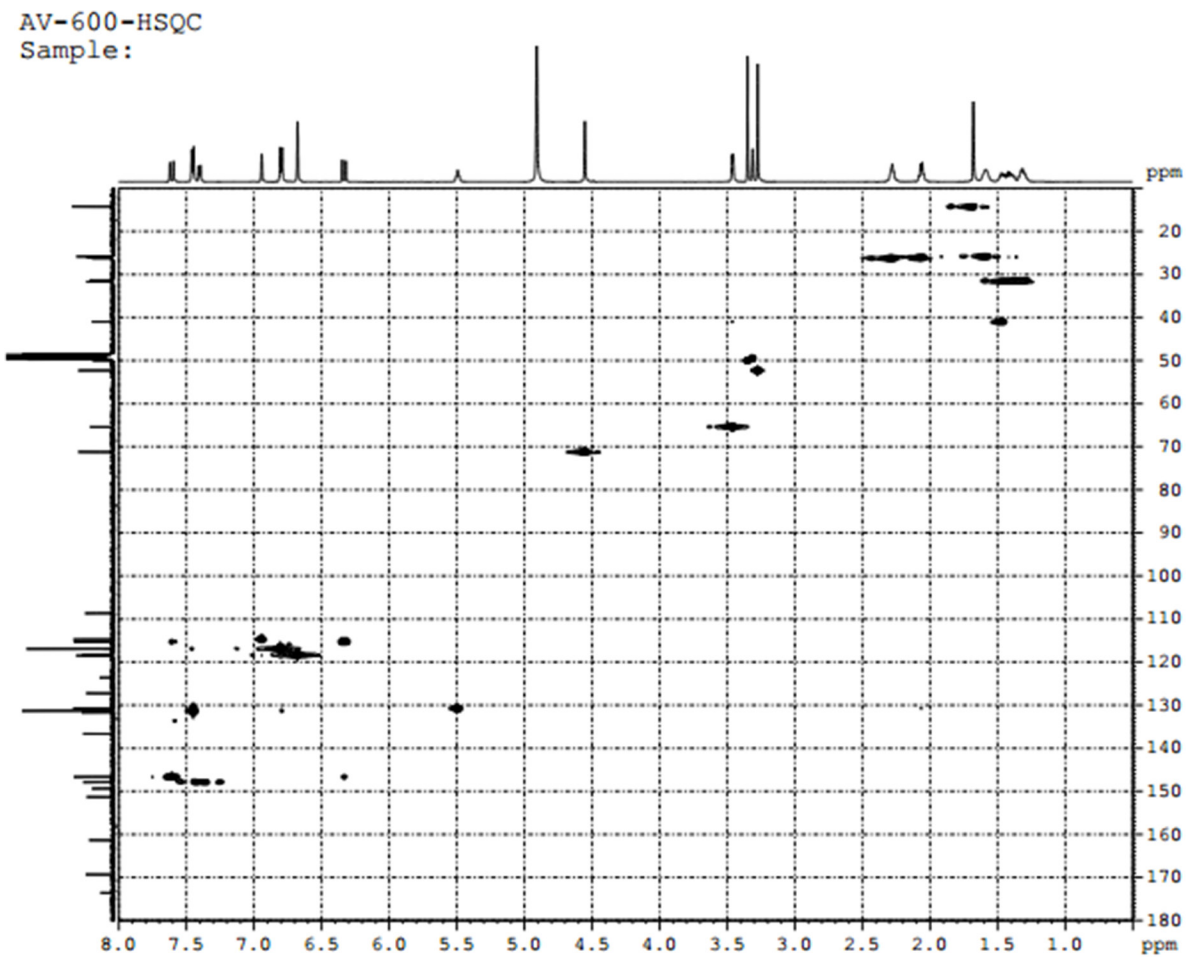

Supplementary Figure 3: HSQC spectrum of 1 and 2 in CD<sub>3</sub>OD.

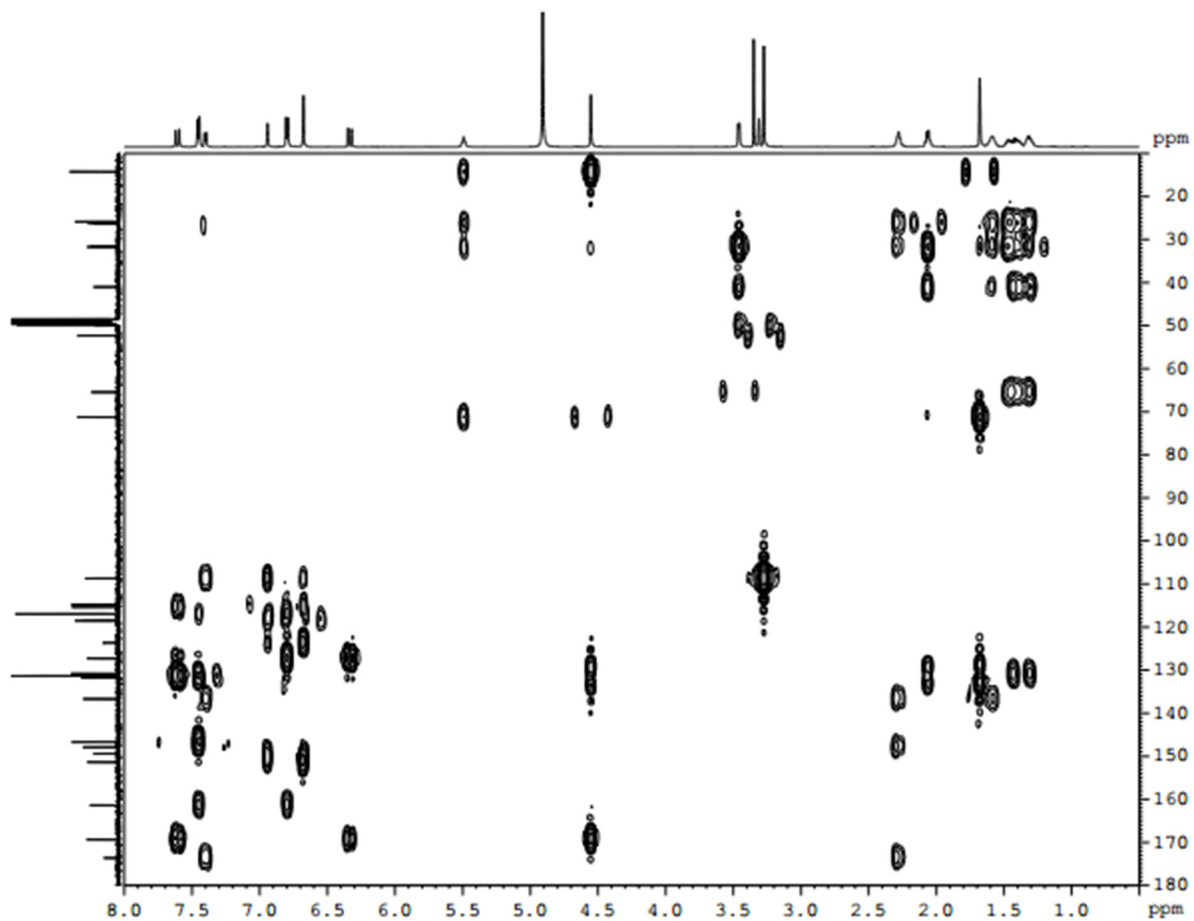

Supplementary Figure 4: HMBC spectrum of 1 and 2 in CD<sub>3</sub>OD.

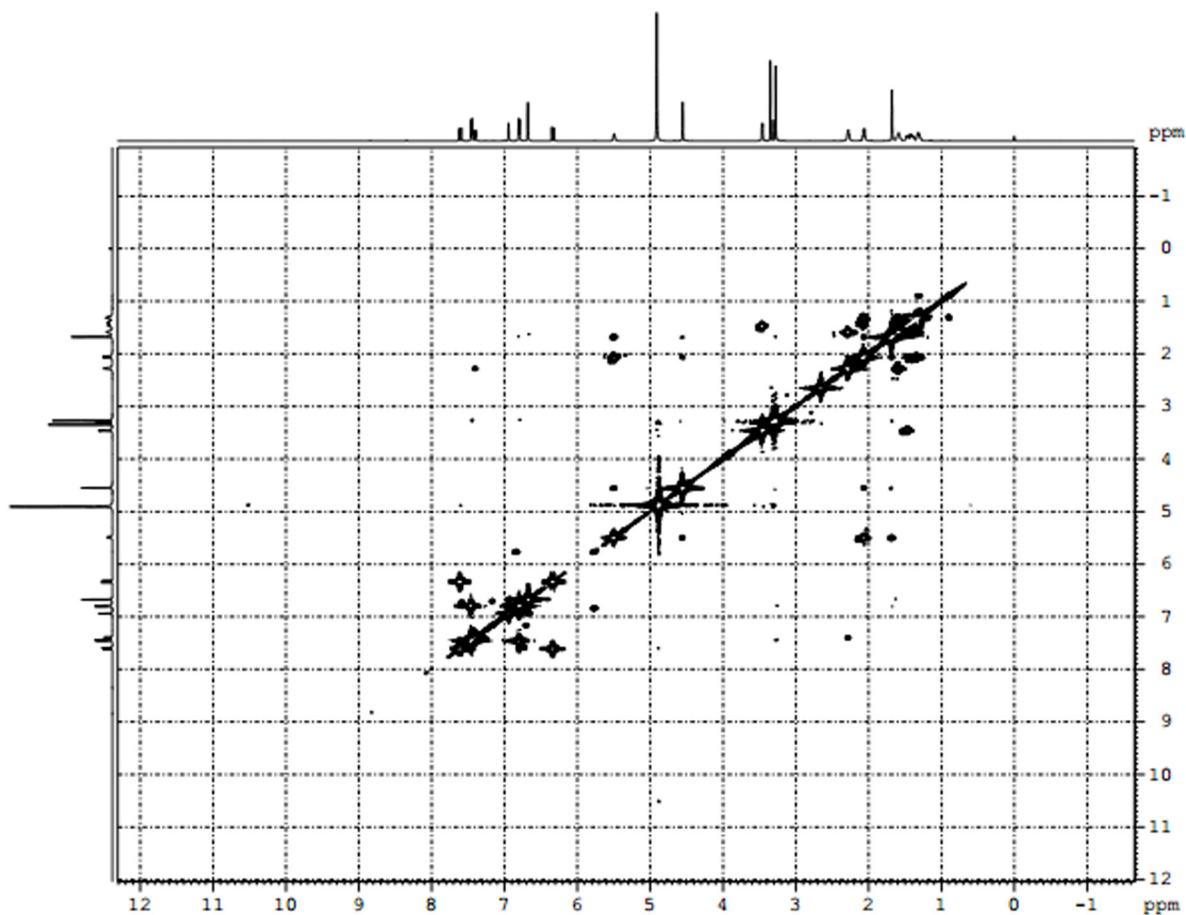

Supplementary Figure 5: <sup>1</sup>H-<sup>1</sup>H COSY spectrum of 1 and 2 in CD<sub>3</sub>OD.

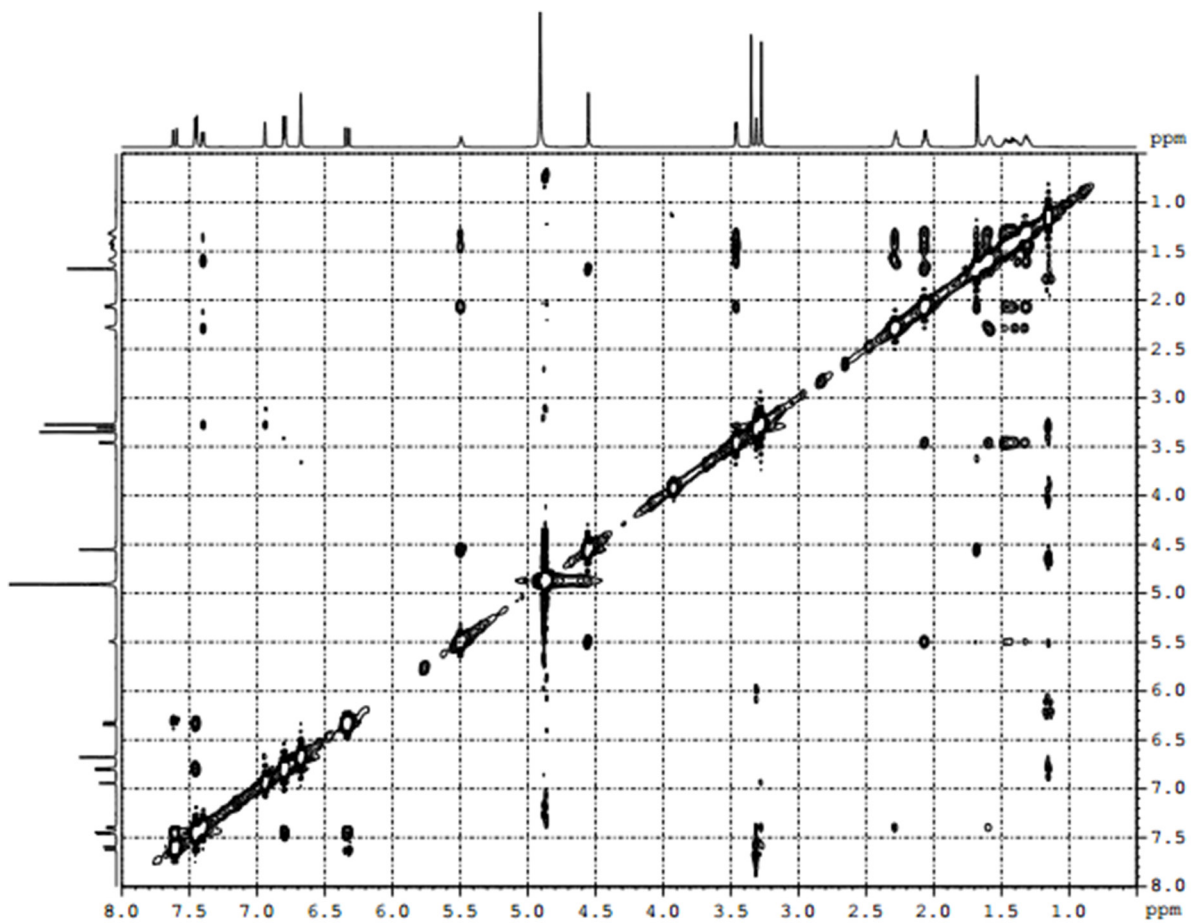

Supplementary Figure 6: NOESY spectrum of 1 and 2 in CD<sub>3</sub>OD.

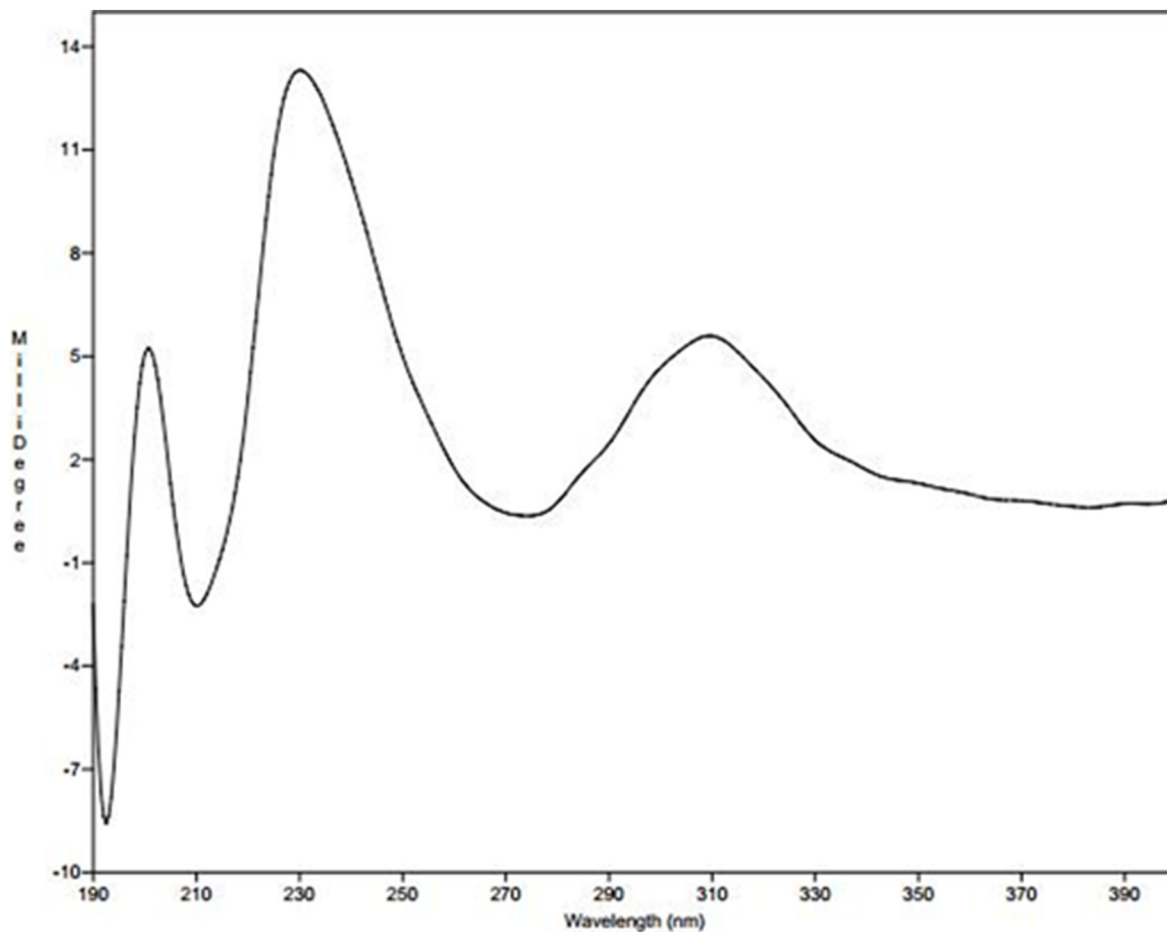

Supplementary Figure 7: CD spectrum of compound 1.

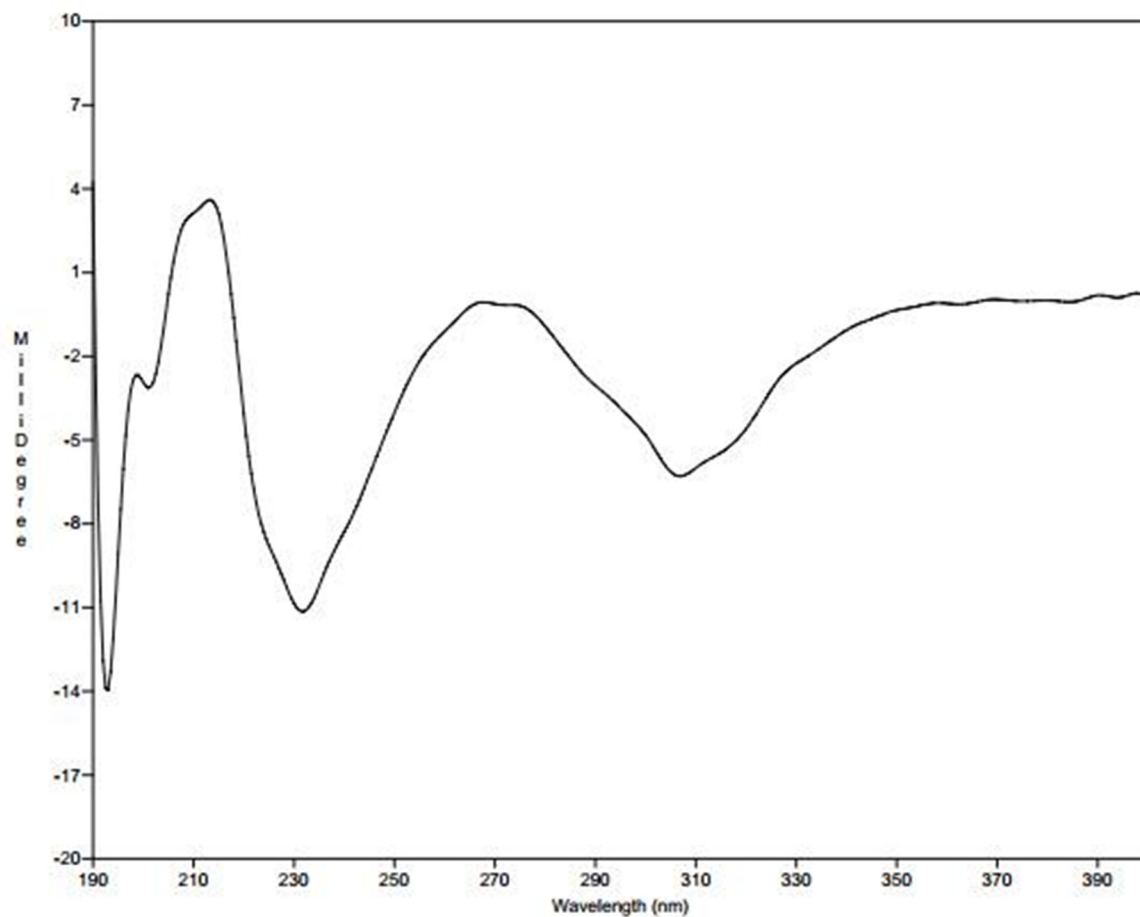

Supplementary Figure 8: CD spectrum of compound 2.



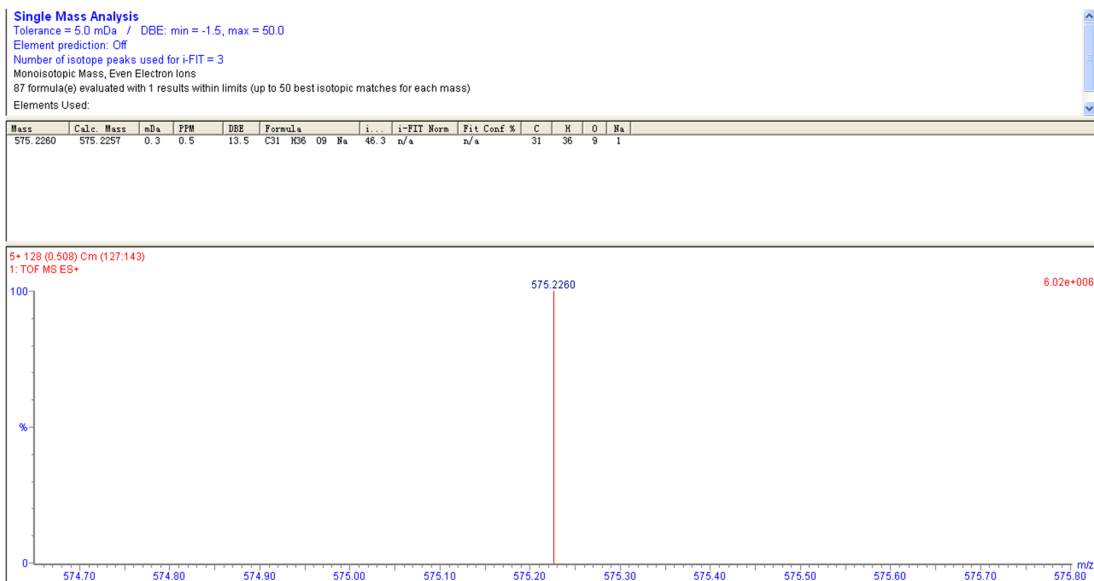

Supplementary Figure 9: HRESIMS data of 1 and 2.

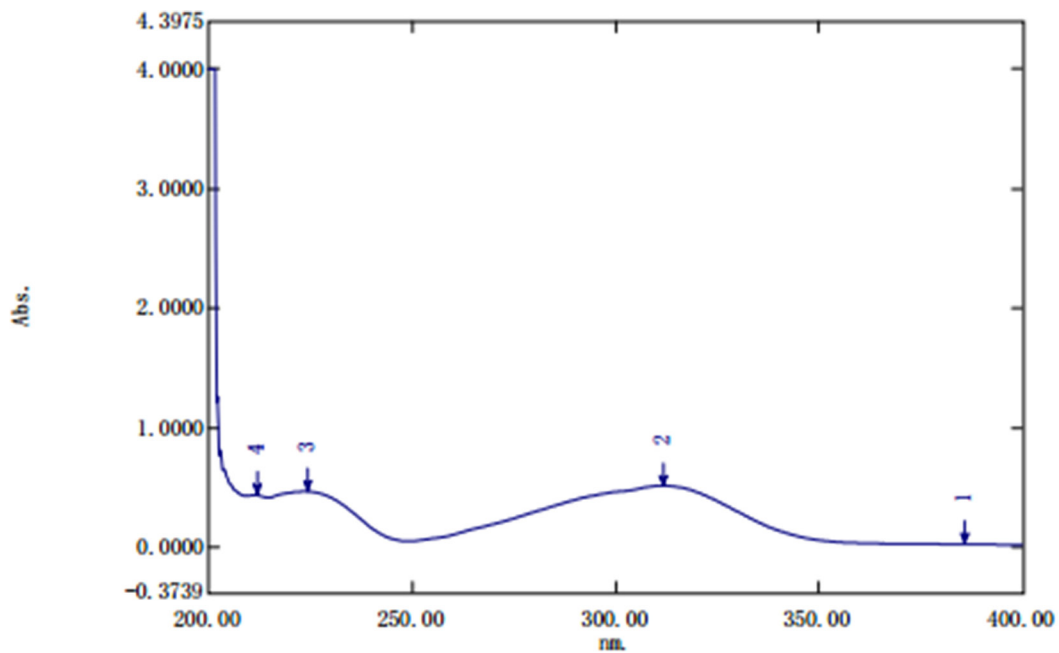

测定属性  
 波长范围 (nm.): 200.00到400.00  
 扫描速度: 中速  
 采样间隔: 0.2  
 自动采样间隔: 启用  
 扫描模式: 自动

试样准备属性  
 重量:  
 体积:

| No. | P/V | Wavelength | Abs.  | 描述 |
|-----|-----|------------|-------|----|
| 1   | ①   | 386.00     | .0292 |    |
| 2   | ②   | 311.60     | .5199 |    |
| 3   | ③   | 224.20     | .4701 |    |
| 4   | ④   | 211.80     | .4410 |    |
| 5   | ⑤   | 361.60     | .0364 |    |
| 6   | ⑥   | 248.40     | .0542 |    |
| 7   | ⑦   | 214.20     | .4185 |    |
| 8   | ⑧   | 210.00     | .4332 |    |

Supplementary Figure 10: UV spectrum of 1 and 2.

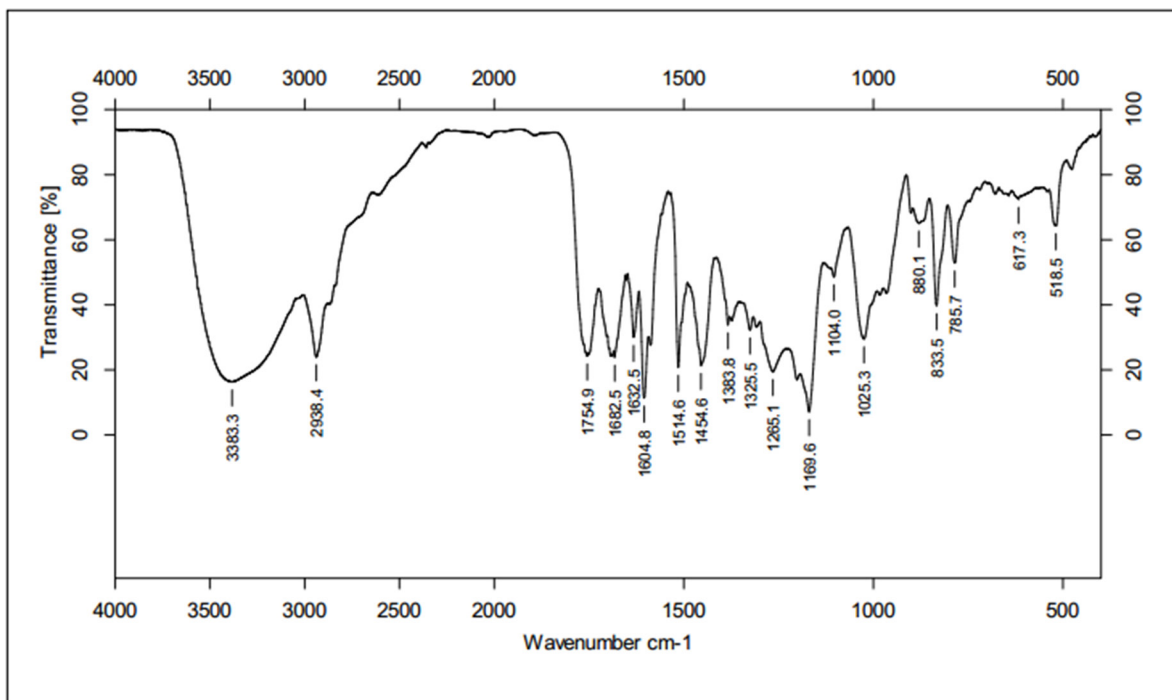

|                         |                 |                                     |  |                         |  |
|-------------------------|-----------------|-------------------------------------|--|-------------------------|--|
| Sample : WM-E53342      |                 | Frequency Range : 3999.64 - 400.157 |  | Measured on : 2015-3-24 |  |
| Technique : Sample form | Resolution : 2  | Instrument : EQUINOX55              |  | Sample Scans : 16       |  |
| Customer : Default      | Zerofilling : 2 | Acquisition : Double Sided,For      |  |                         |  |

Supplementary Figure 11: IR spectrum of 1 and 2.

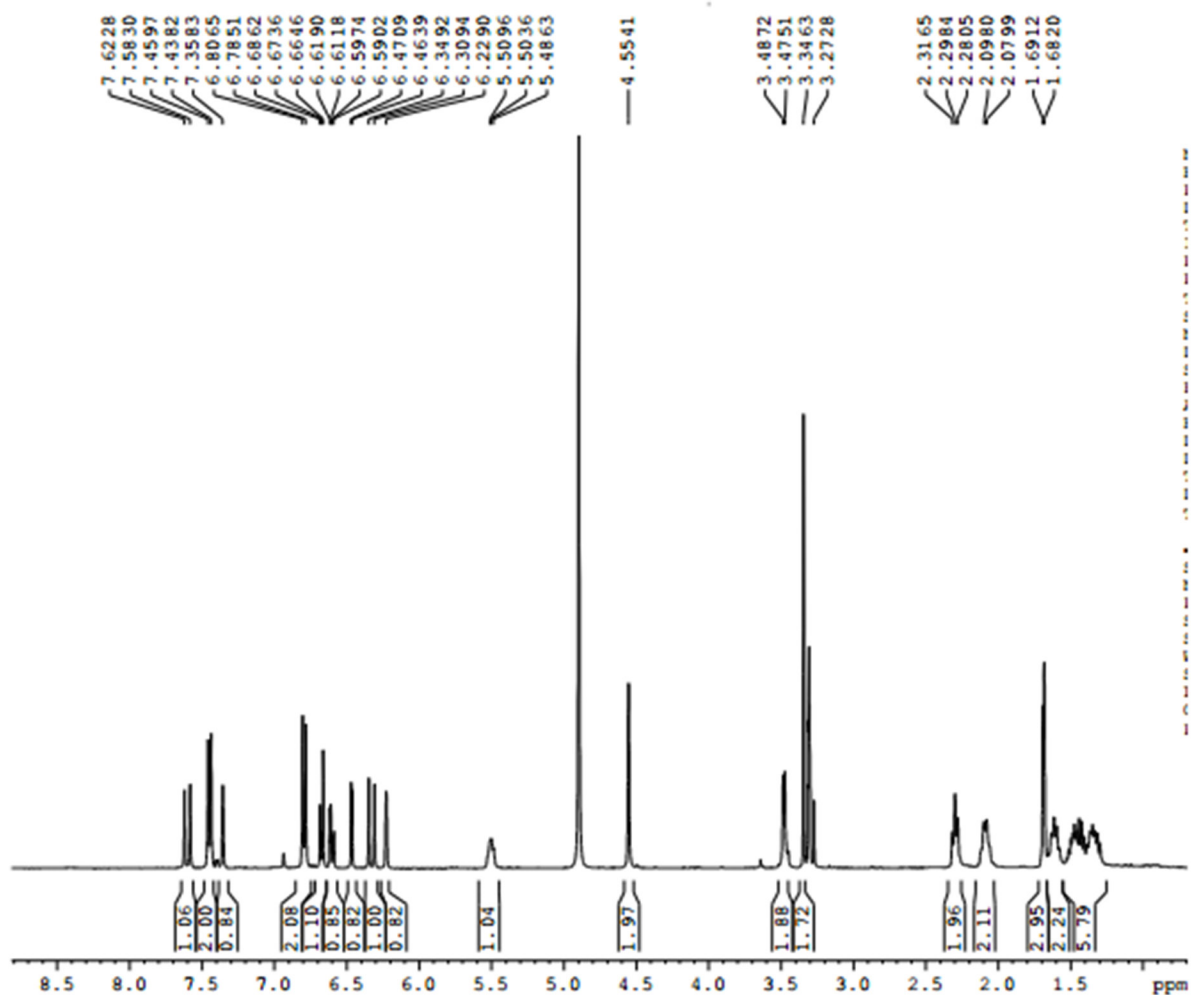

Supplementary Figure 12: <sup>1</sup>H NMR (400 MHz) spectrum of 3 and 4 in CD<sub>3</sub>OD.

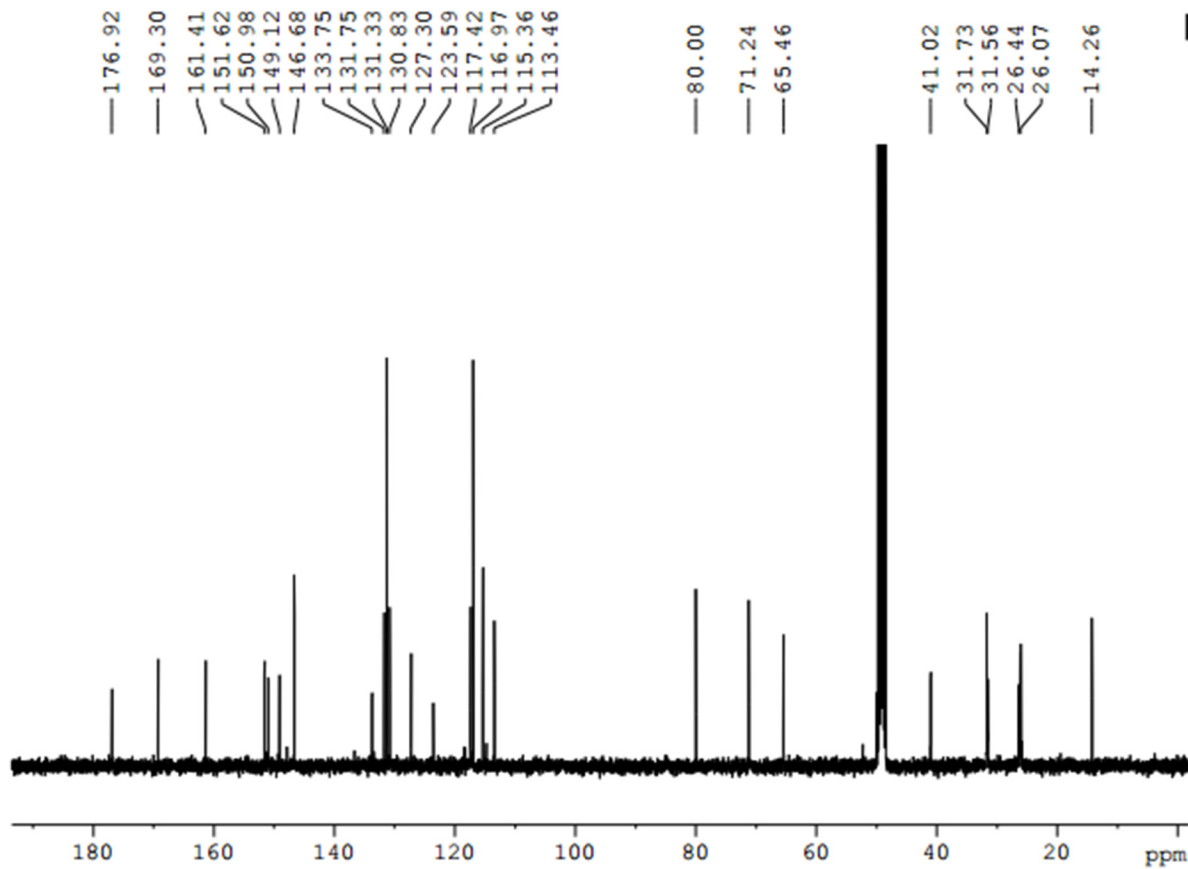

Supplementary Figure 13: <sup>13</sup>C NMR (100 MHz) spectrum of 3 and 4 in CD<sub>3</sub>OD.

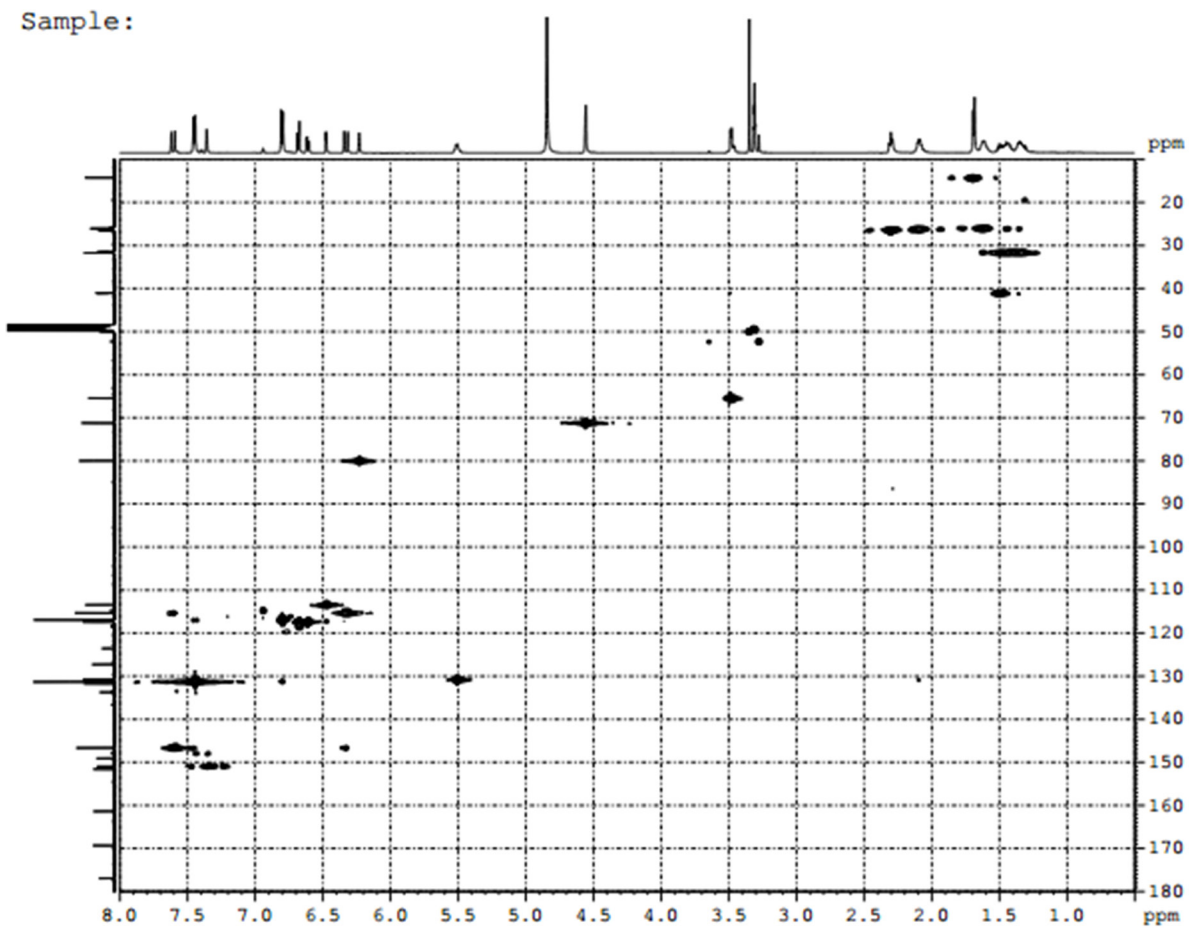

Supplementary Figure 14: HSQC spectrum of 3 and 4 in CD<sub>3</sub>OD.

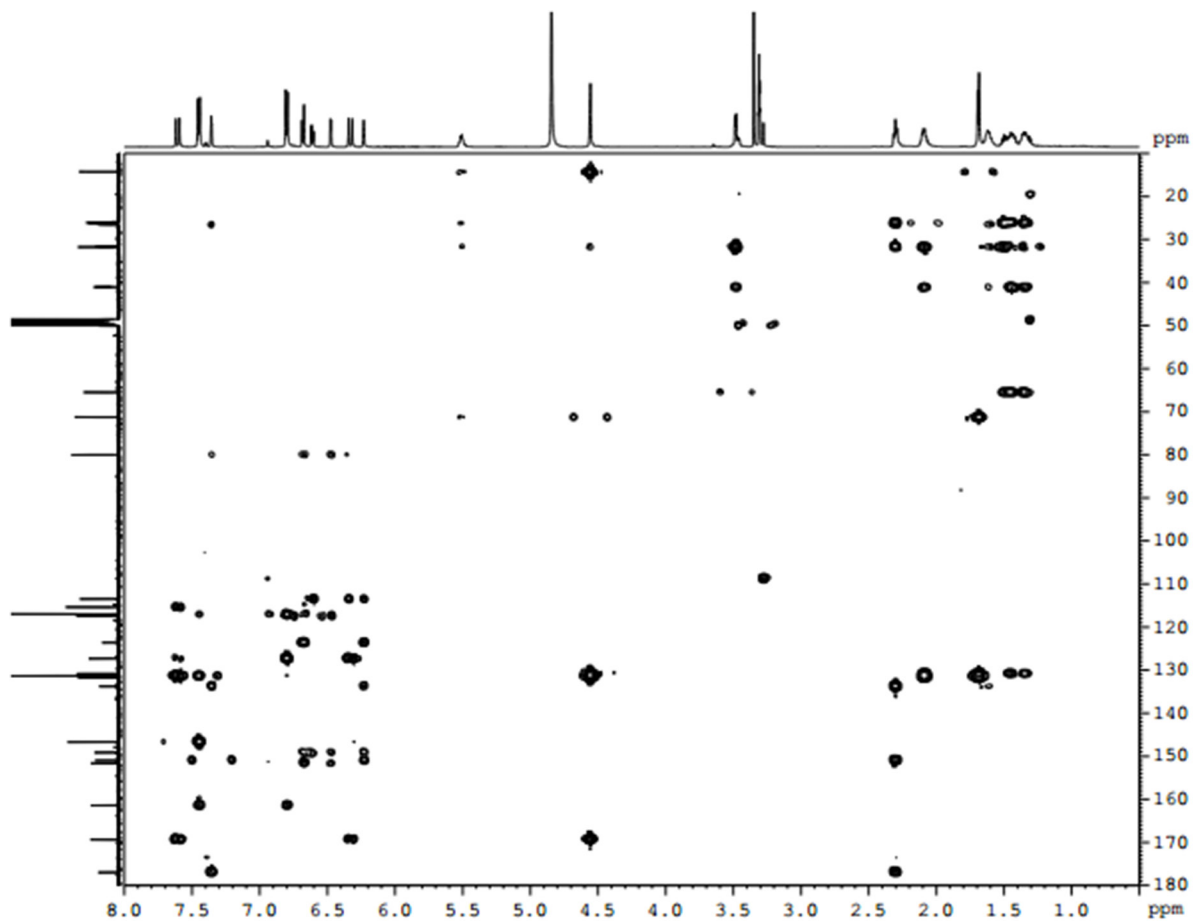

Supplementary Figure 15: HMBC spectrum of 3 and 4 in CD<sub>3</sub>OD.

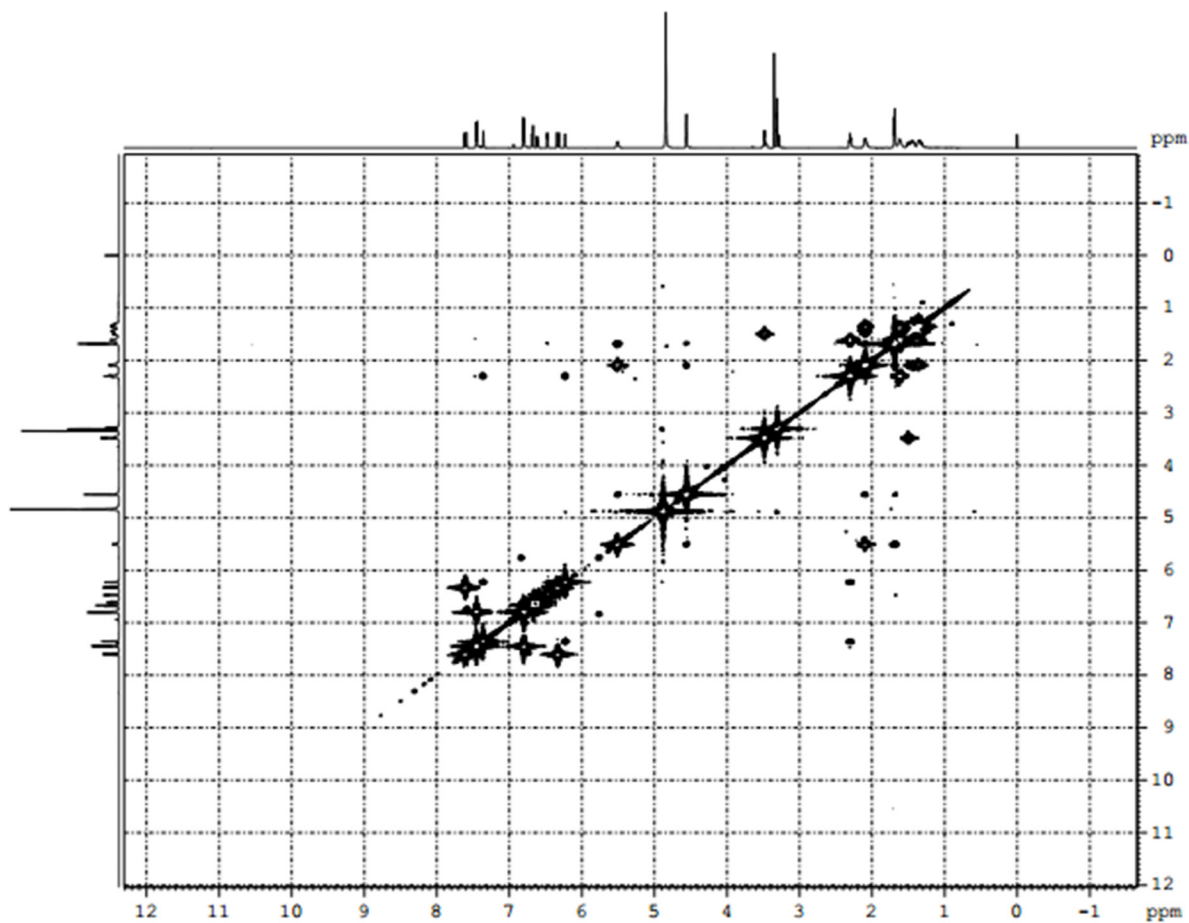

Supplementary Figure 16: <sup>1</sup>H-<sup>1</sup>H COSY spectrum of 3 and 4 in CD<sub>3</sub>OD.



AV-600-NOESY  
Sample:

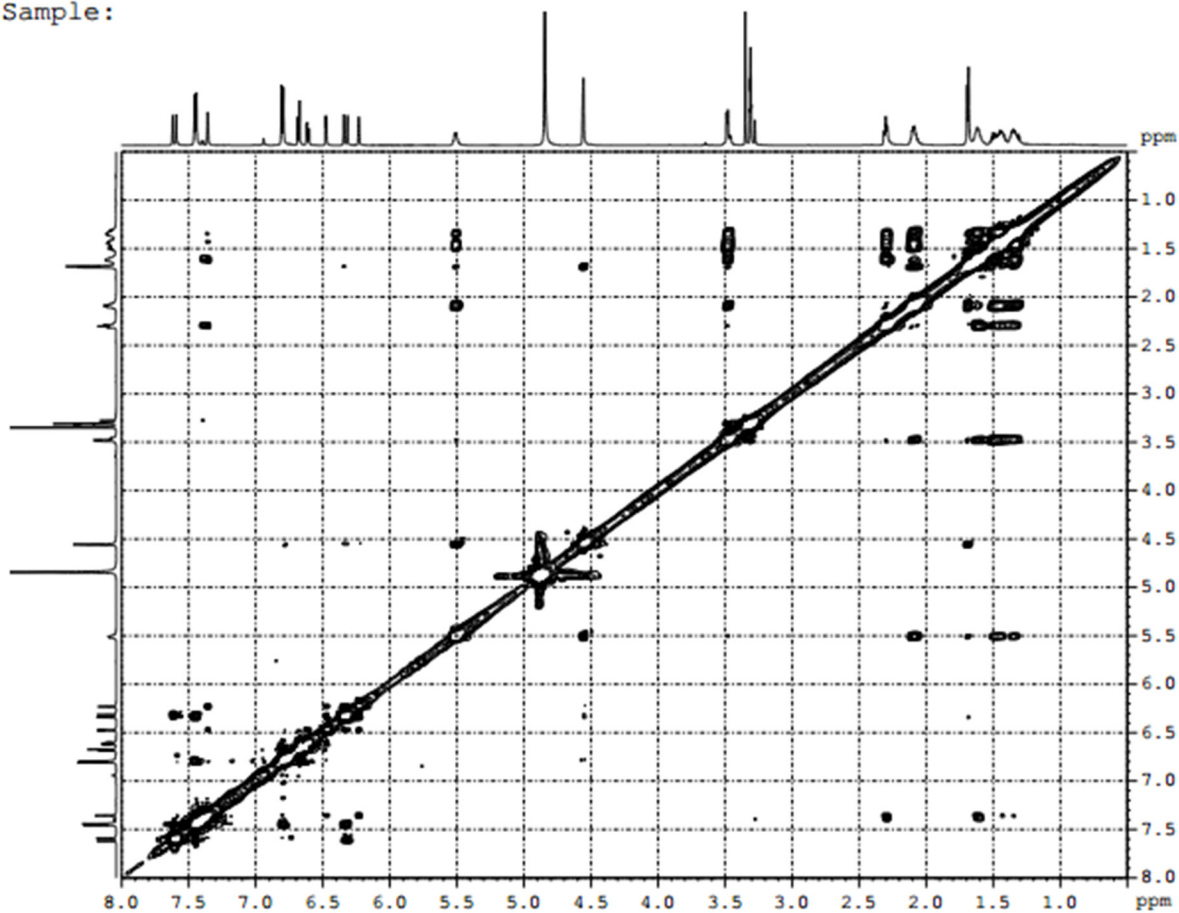

Supplementary Figure 17: NOESY spectrum of 3 and 4 in CD<sub>3</sub>OD.

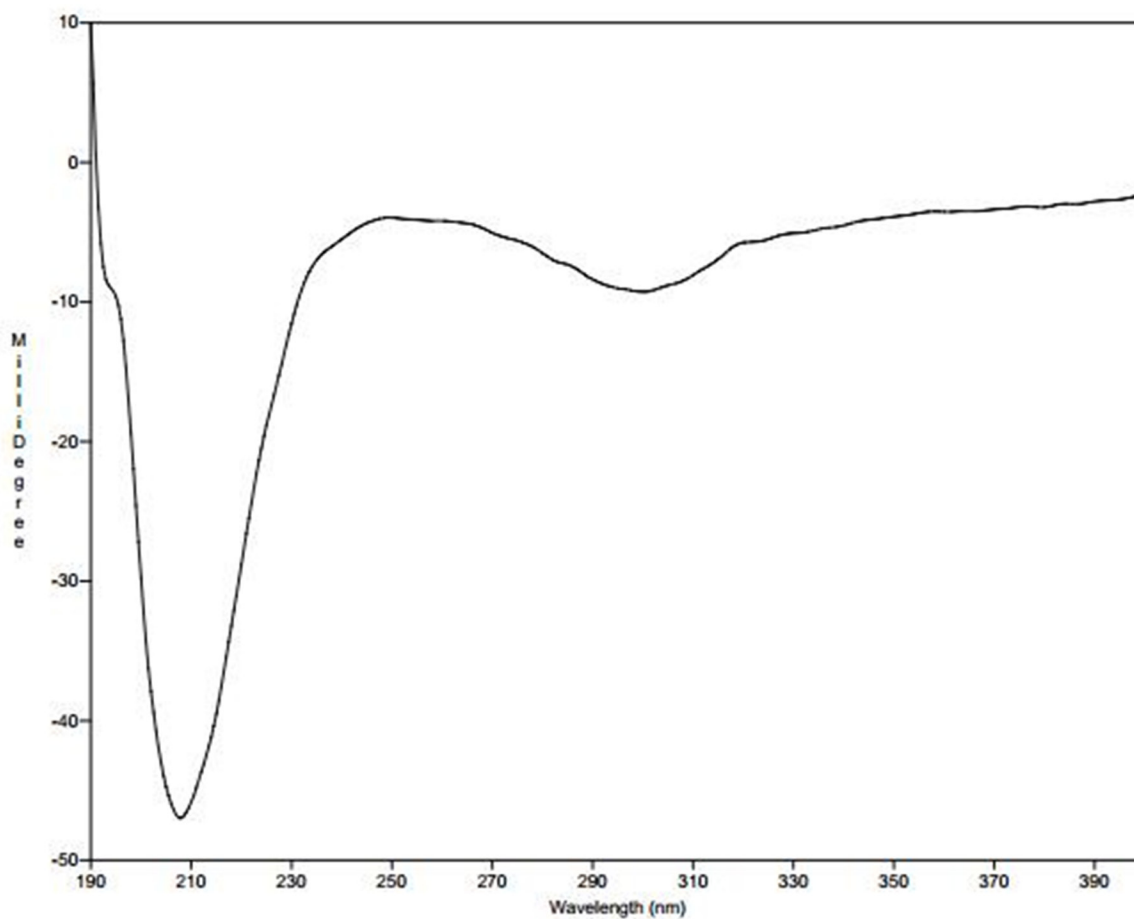

Supplementary Figure 18: CD spectrum of compound 3.

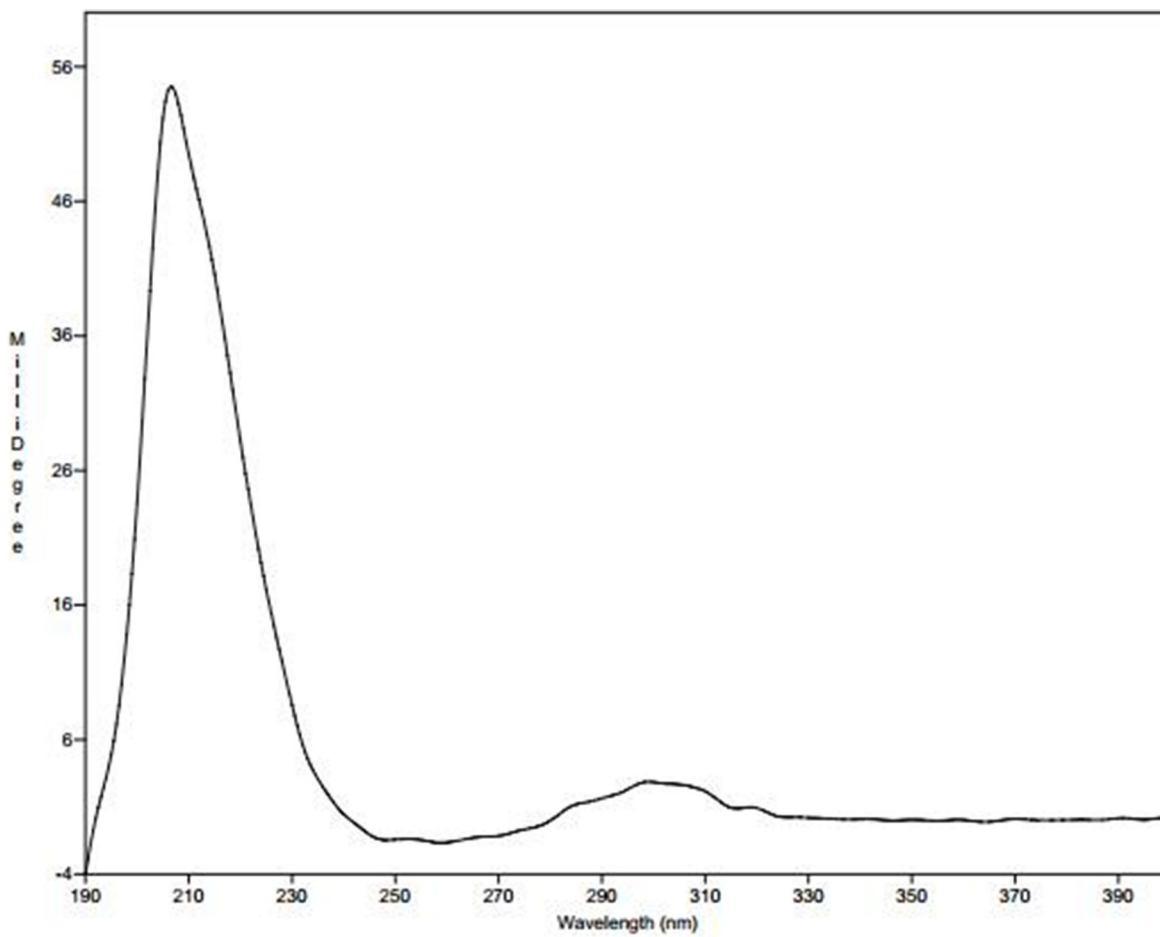

Supplementary Figure 19: CD spectrum of compound 4.

**Single Mass Analysis**

Tolerance = 5.0 mDa / DBE: min = -1.5, max = 50.0

Element prediction: Off

Number of isotope peaks used for i-FIT = 3

Monoisotopic Mass, Even Electron Ions

75 formula(e) evaluated with 1 results within limits (up to 50 best isotopic matches for each mass)

Elements Used:

| Mass     | Calc. Mass | mDa | PPM | DBE  | Formula       | i-FIT | i-FIT Norm | Fit. Conf. % | C  | H  | O | Na |
|----------|------------|-----|-----|------|---------------|-------|------------|--------------|----|----|---|----|
| 545.2153 | 545.2151   | 0.2 | 0.4 | 13.5 | C30 H34 O8 Na | 110.7 | n/a        | n/a          | 30 | 34 | 8 | 1  |

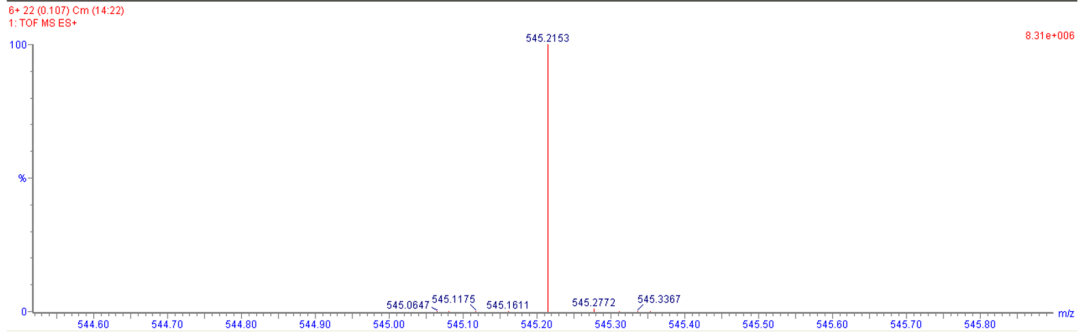

**Supplementary Figure 20: HRESIMS data of 3 and 4.**

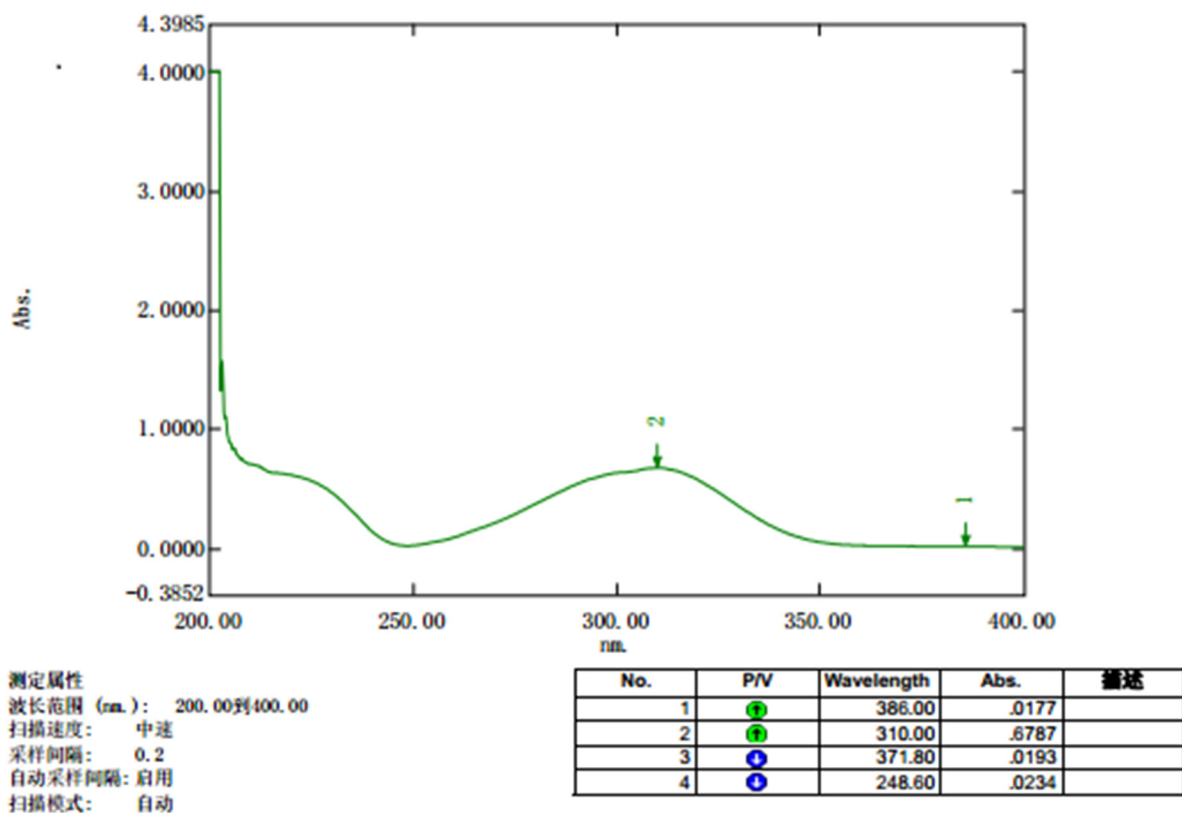

Supplementary Figure 21: UV spectrum of 3 and 4.

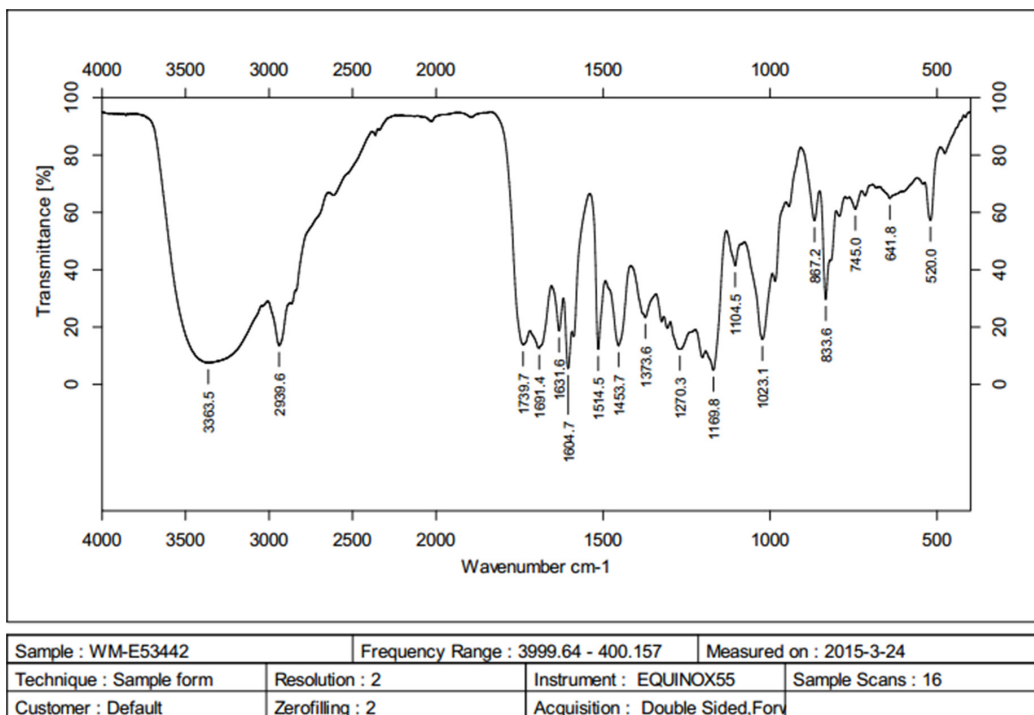

Supplementary Figure 22: IR spectrum of 3 and 4.

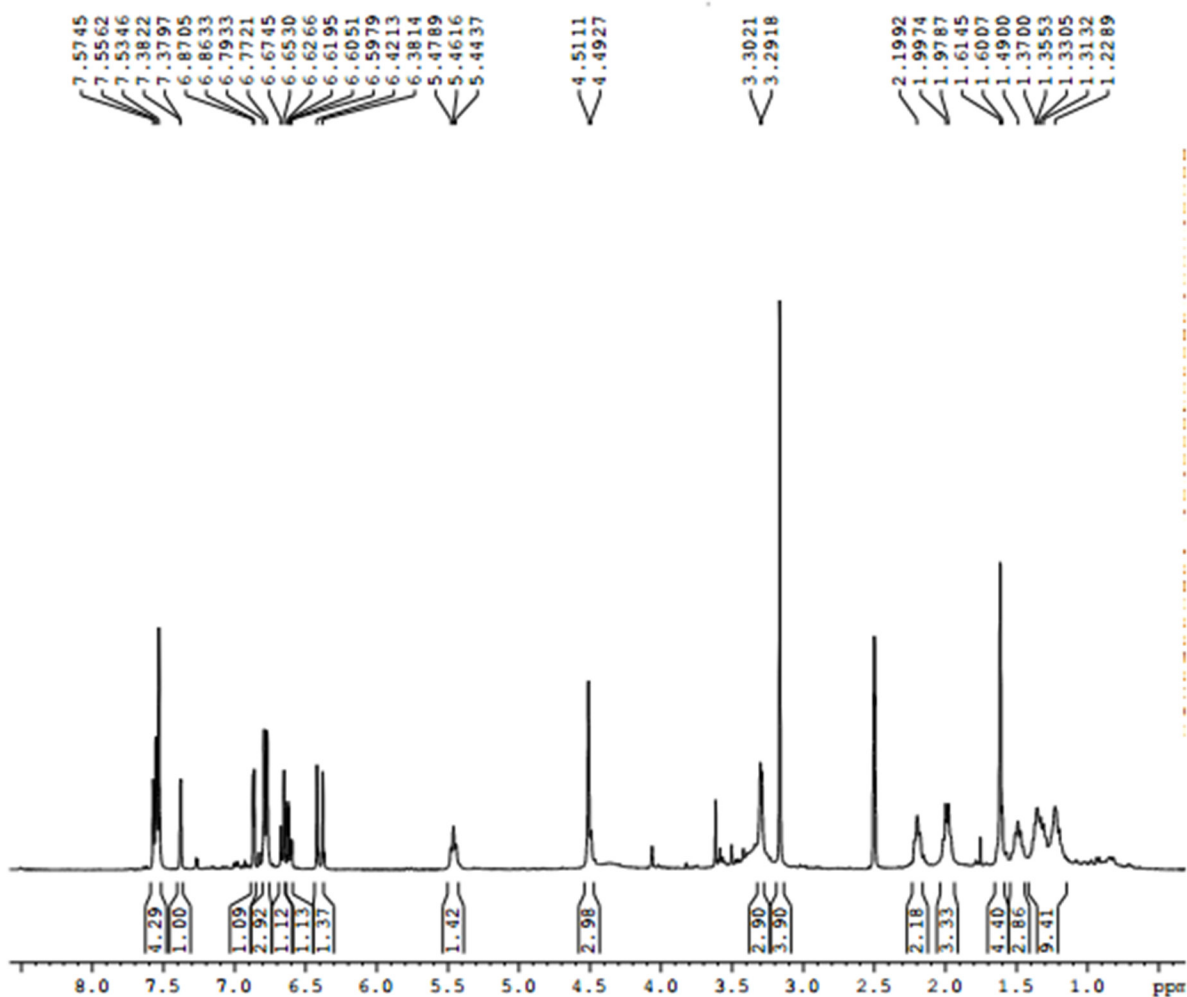

Supplementary Figure 23: <sup>1</sup>H NMR (400 MHz) spectrum of 5 and 6 in DMSO-*d*<sub>6</sub>.

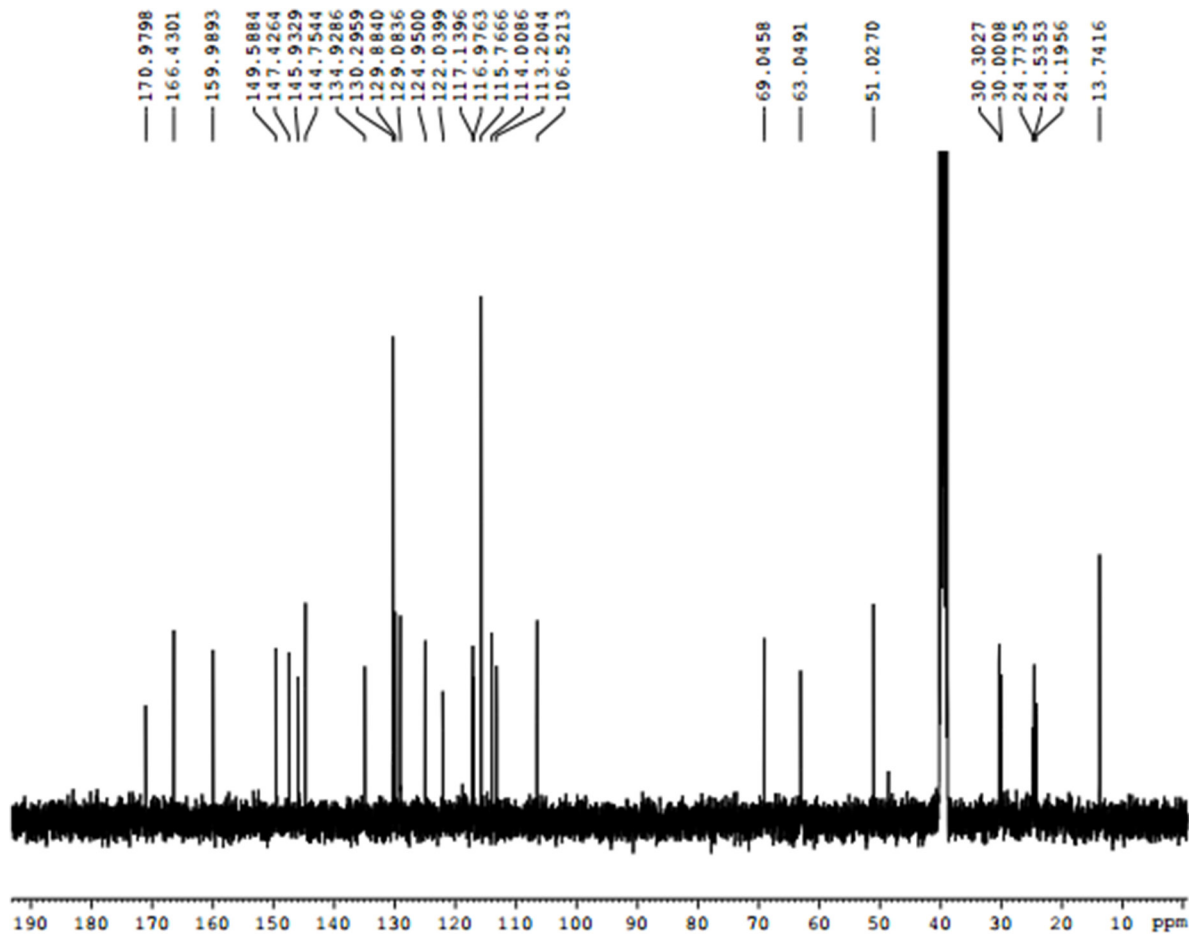

Supplementary Figure 24:  $^{13}\text{C}$  NMR (100 MHz) spectrum of 5 and 6 in  $\text{DMSO-}d_6$ .



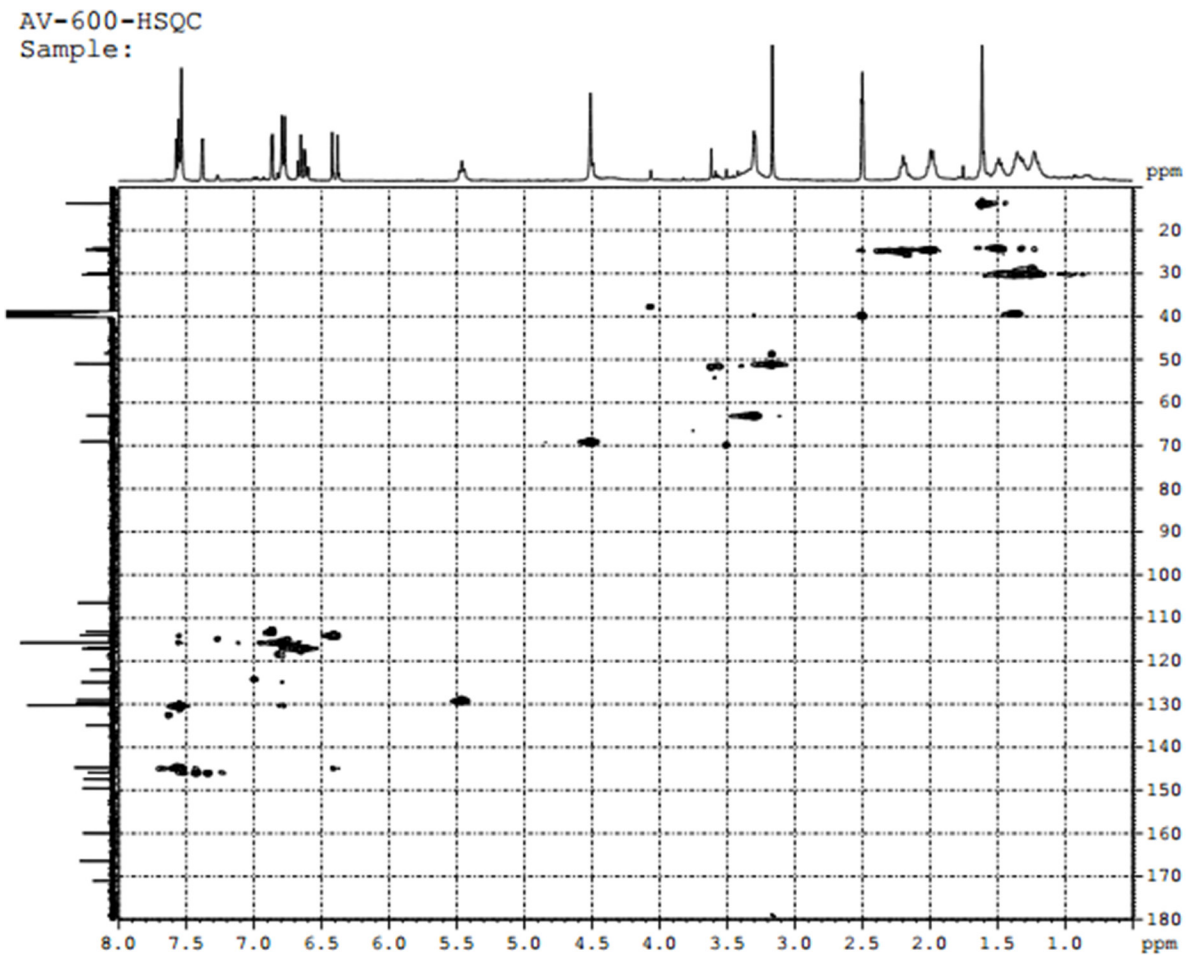

Supplementary Figure 25: HSQC spectrum of 5 and 6 in DMSO- $d_6$ .

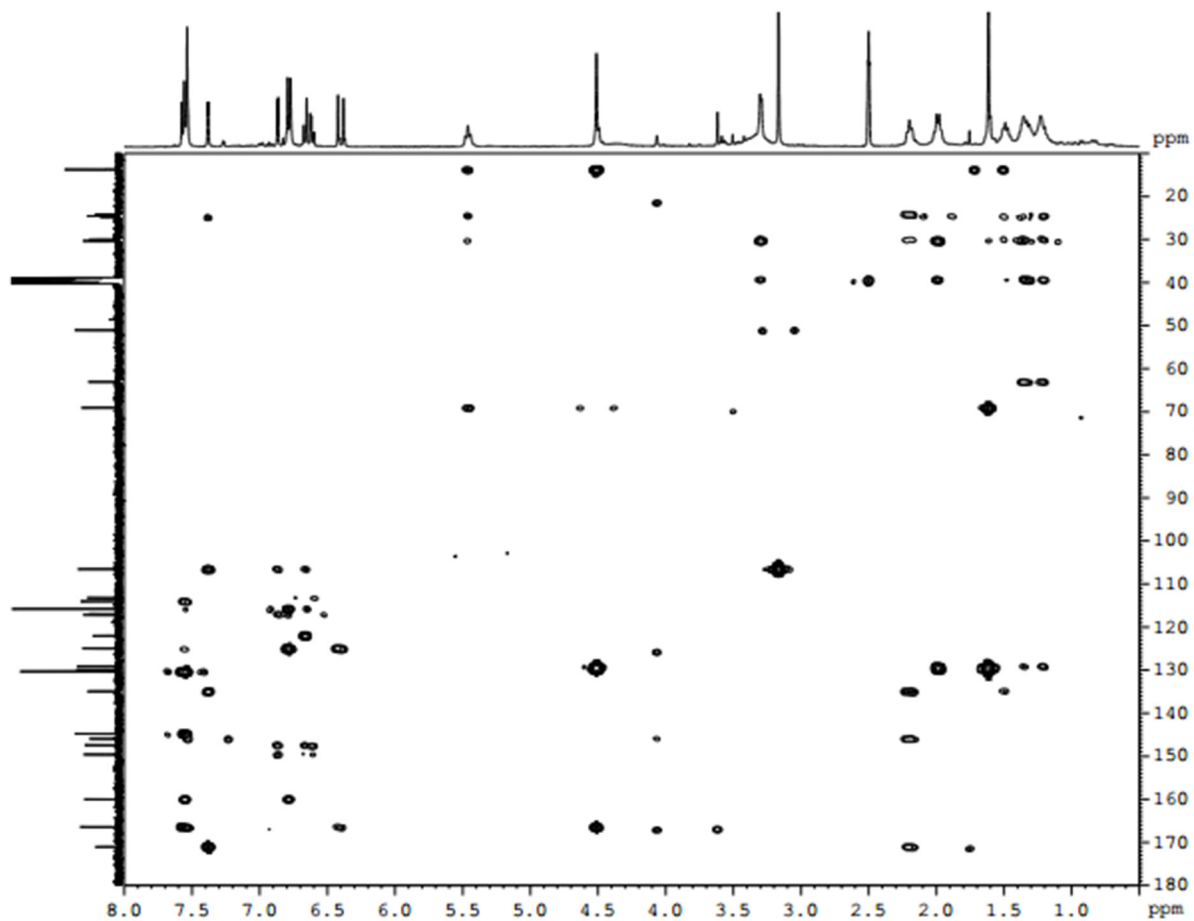

Supplementary Figure 26: HMBC spectrum of 5 and 6 in DMSO-*d*<sub>6</sub>.

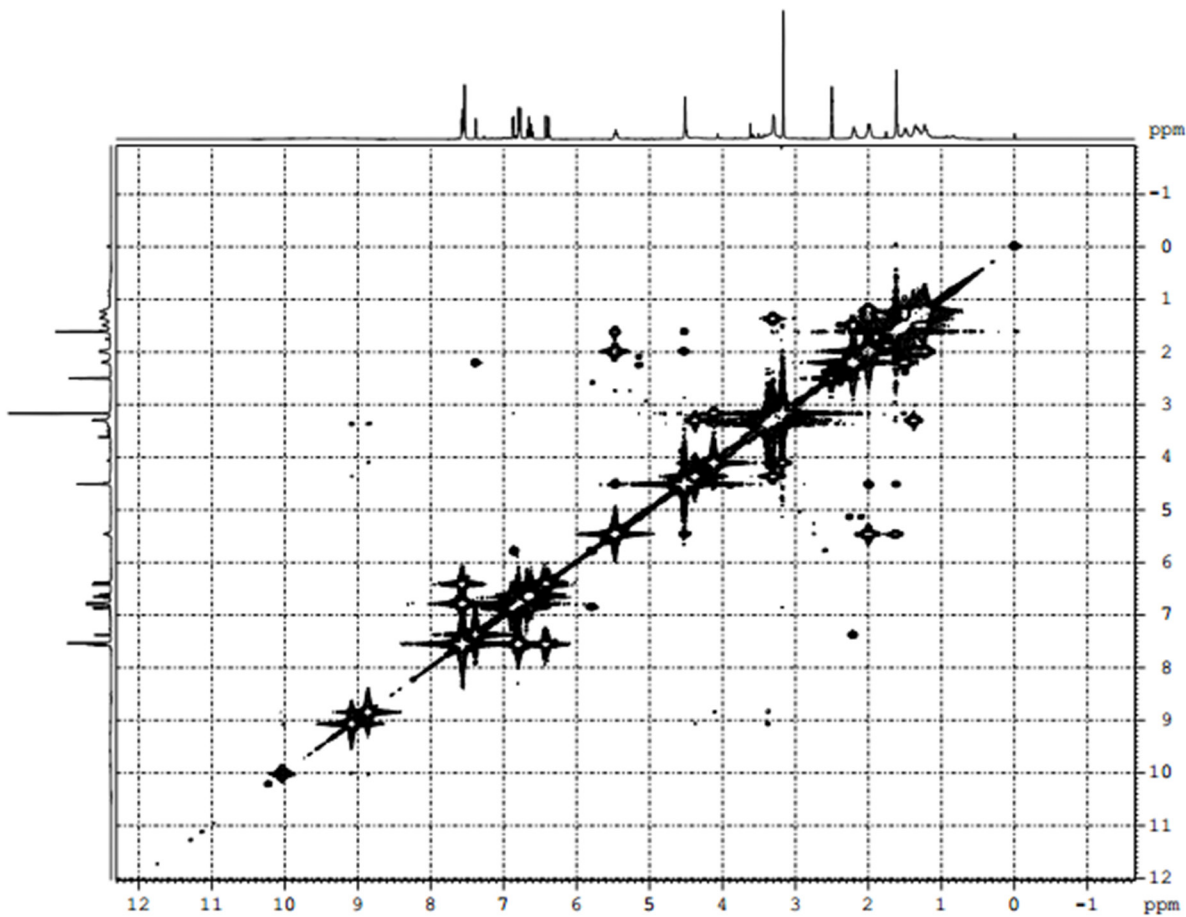

Supplementary Figure 27:  $^1\text{H}$ - $^1\text{H}$  COSY spectrum of 5 and 6 in  $\text{DMSO-}d_6$ .

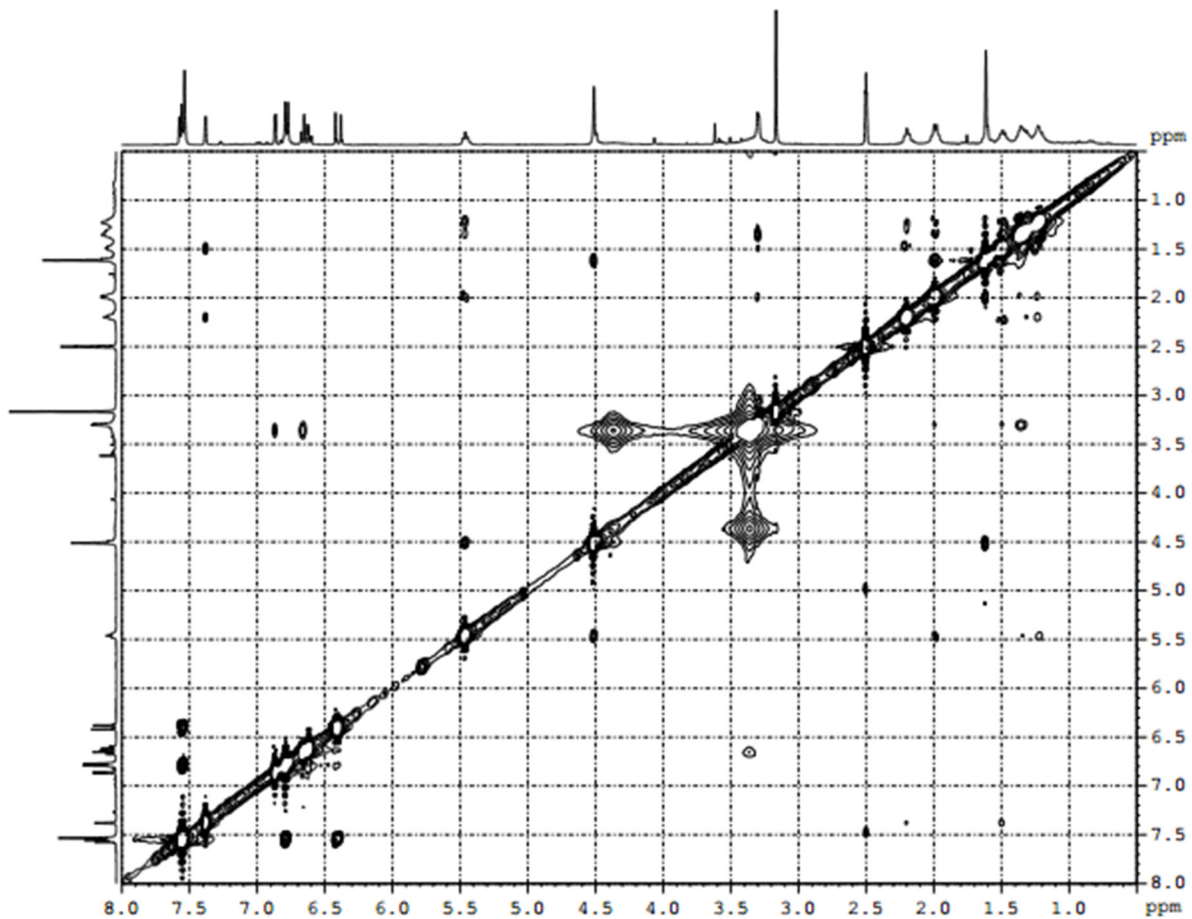

Supplementary Figure 28: NOESY spectrum of 5 and 6 in DMSO-*d*<sub>6</sub>.

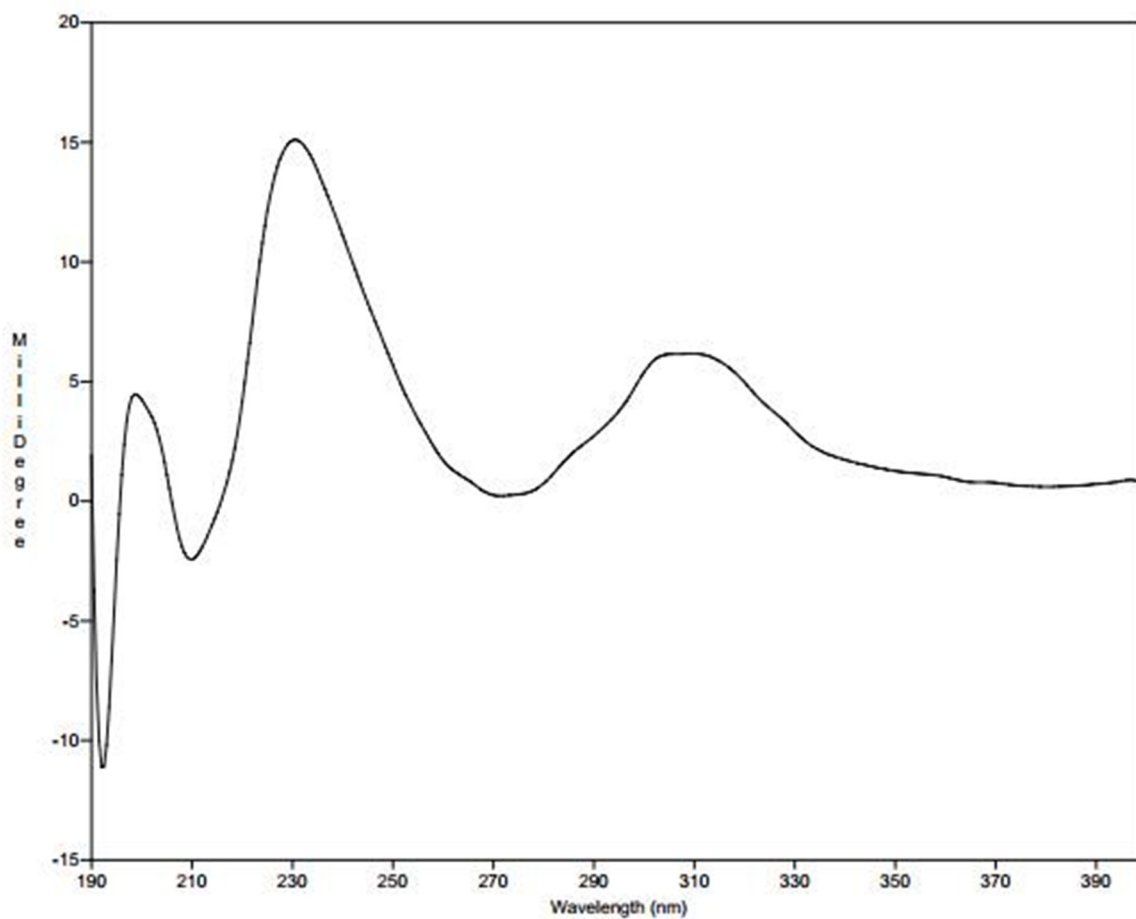

Supplementary Figure 29: CD spectrum of compound 5.

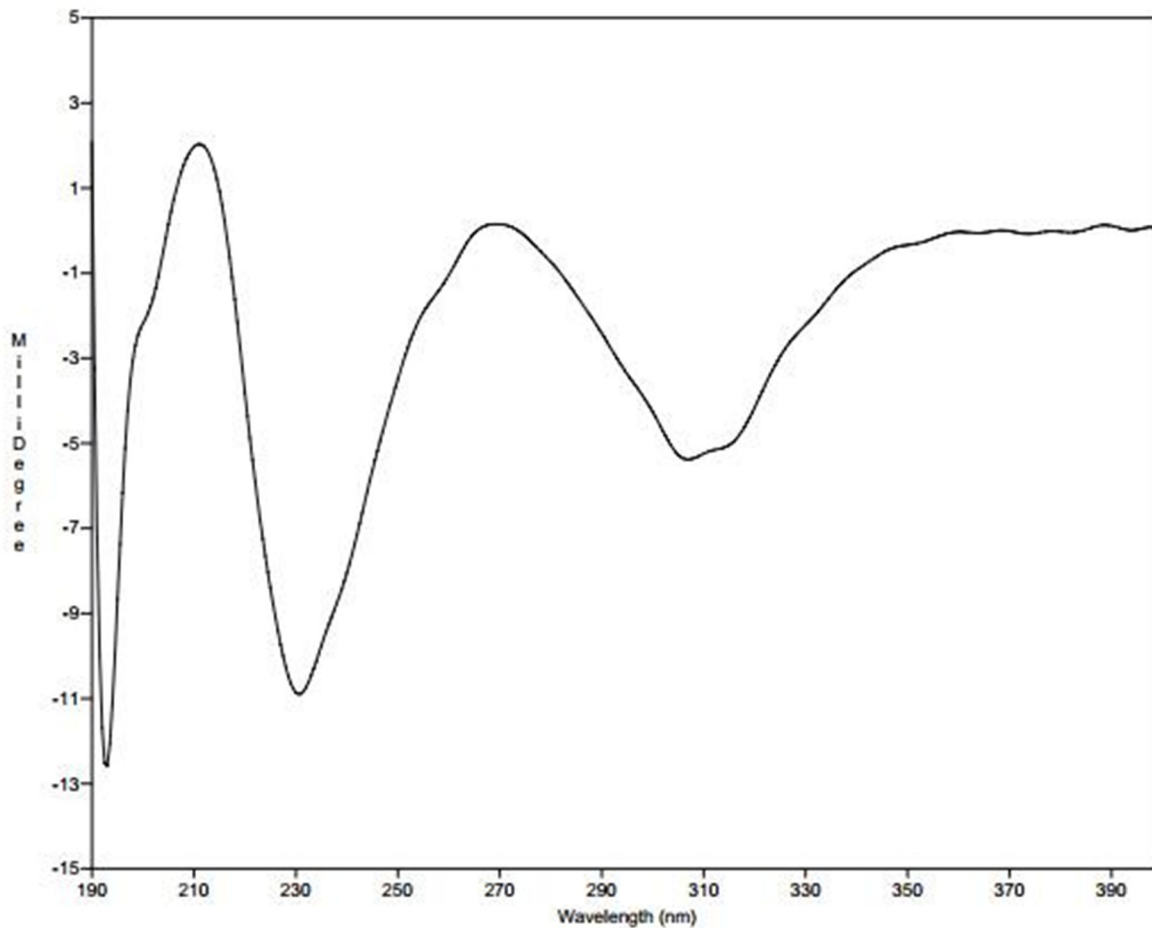

Supplementary Figure 30: CD spectrum of compound 6.

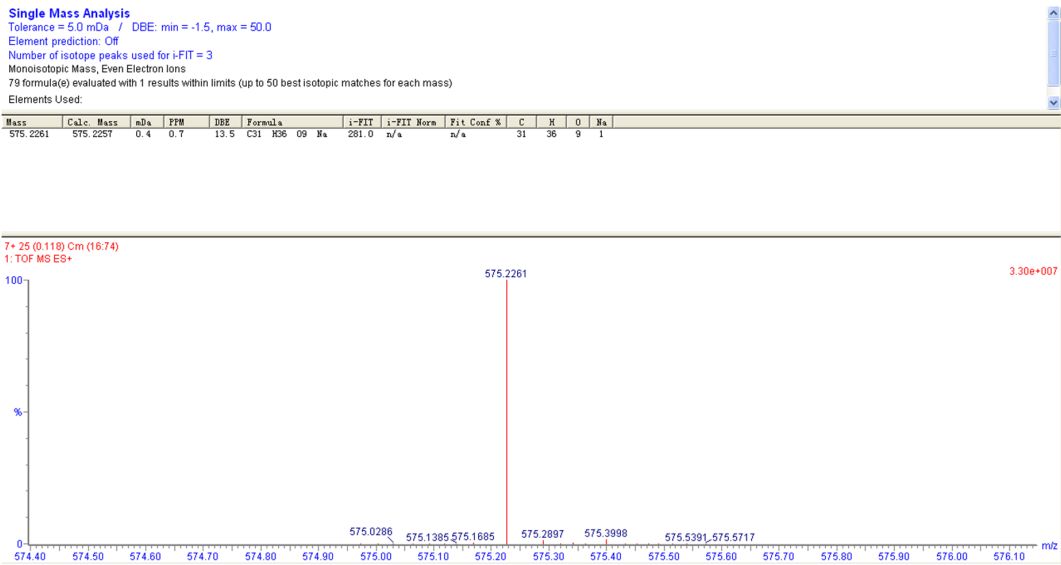

Supplementary Figure 31: HRESIMS data of 5 and 6.

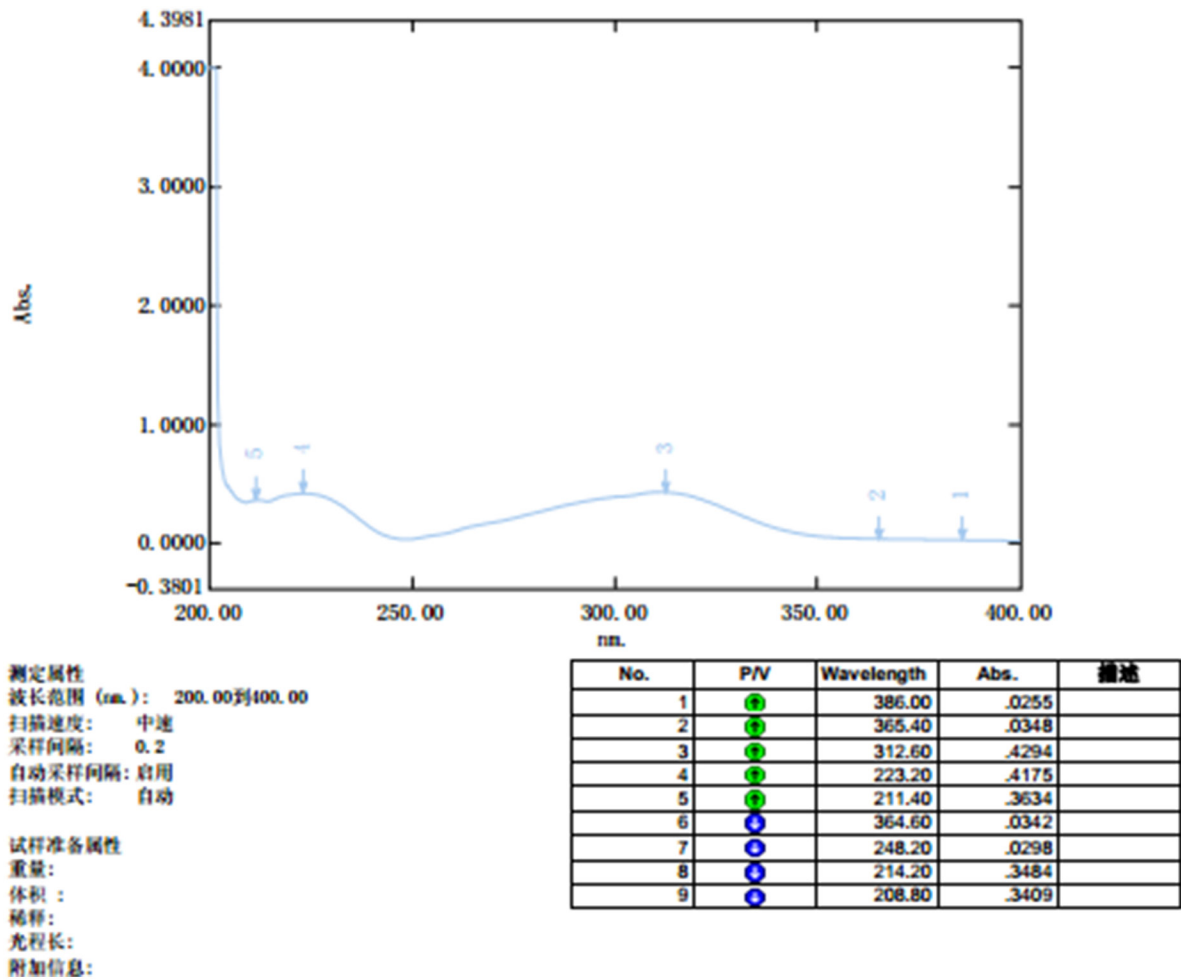

Supplementary Figure 32: UV spectrum of 5 and 6.



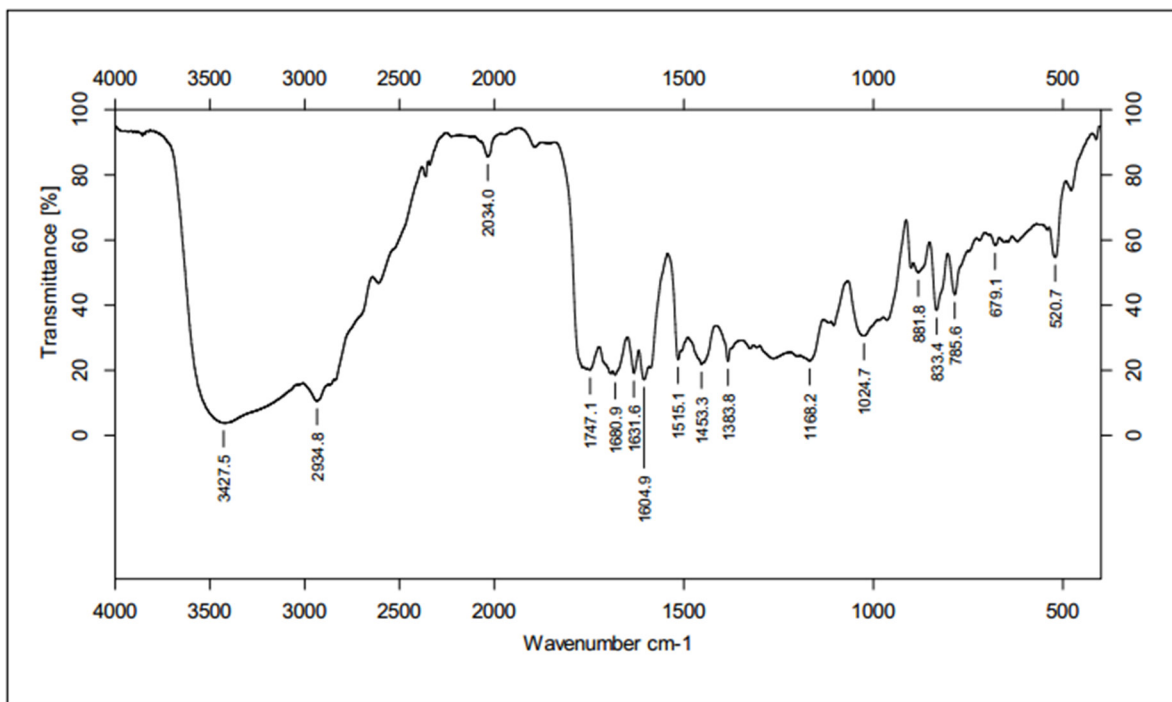

|                         |                 |                                     |  |                         |  |
|-------------------------|-----------------|-------------------------------------|--|-------------------------|--|
| Sample : WM-E53444      |                 | Frequency Range : 3999.64 - 400.157 |  | Measured on : 2015-3-24 |  |
| Technique : Sample form | Resolution : 2  | Instrument : EQUINOX55              |  | Sample Scans : 16       |  |
| Customer : Default      | Zerofilling : 2 | Acquisition : Double Sided,For      |  |                         |  |

Supplementary Figure 33: IR spectrum of 5 and 6.
